# Supplementary material for: Evaluation of Pathogenicity and Structural Alterations for the Mutations Identified in the Conserved Region of the C-Terminal Kinase Domain of Human-Ribosomal S6 Kinase 1
Source: PubMed Central journal article supplement — ACS Omega. 2023 Apr 26;8(18):16273–83. doi: 10.1021/acsomega.3c00722 (PMC10173430; doi:10.1021/acsomega.3c00722), 2023-04-26
Supplement: ao3c00722_si_001.pdf [file ao3c00722_si_001.pdf]

**Evaluation of Pathogenicity and Structural Alterations for the Mutations Identified in the Conserved Region of C-Terminal Kinase Domain of human- Ribosomal S6 Kinase 1**

**Vaishnvee Chikhale<sup>a,b</sup>, Nabajyoti Goswami<sup>a</sup>, Mudassar Ali Khan<sup>a,b</sup>, Probodh Borah<sup>c</sup> and Ashok K. Varma<sup>a,b,\*</sup>**

<sup>a</sup> *Advanced Centre for Treatment, Research and Education in Cancer, Navi Mumbai, Maharashtra, 410210, India*

<sup>b</sup> *Homi Bhabha National Institute, Training School Complex, Anushaktinagar, Mumbai, Maharashtra, 400094, India*

<sup>c</sup> *Bioinformatics Infrastructure Facility, College of Veterinary Science, Assam Agricultural University, Khanapara, Guwahati, Assam, India 781022.*

\* Corresponding author at: Tata Memorial Centre, Advanced Centre for Treatment, Research and Education in Cancer, Navi Mumbai, Maharashtra, 410210, India.

E-mail address: [avarma@actrec.gov.in](mailto:avarma@actrec.gov.in)

**Keywords:** RSK1; missense mutation; cancer; molecular dynamics simulation; PCA.

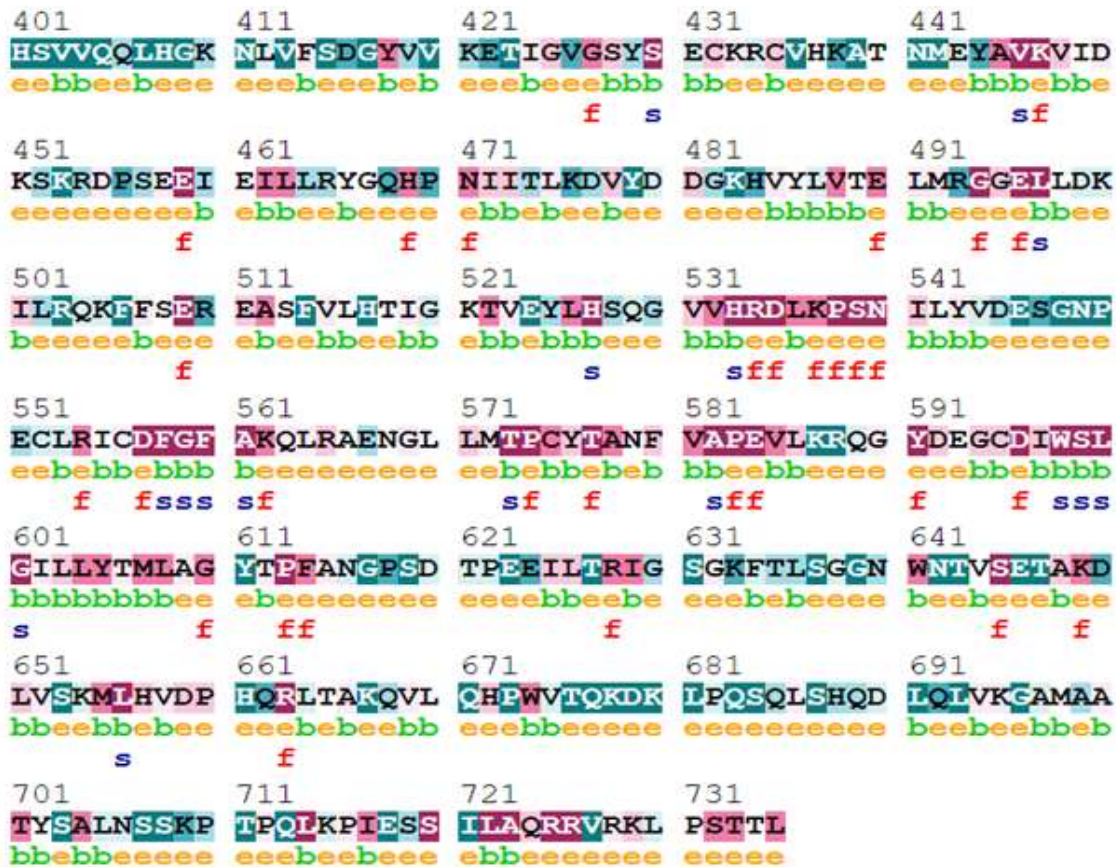

**Legend:**

The conservation scale:

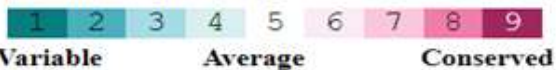

- e** - An exposed residue according to the neural-network algorithm.
- b** - A buried residue according to the neural-network algorithm.
- f** - A predicted functional residue (highly conserved and exposed).
- s** - A predicted structural residue (highly conserved and buried).
- x** - Insufficient data - the calculation for this site was performed on less than 10% of the sequences.

**Figure S1.** Evolutionary conservancy of RSK1-CTKD generated by ConSurf. Based on multiple sequence alignment ConSurf generates a colour-coded output. The higher the score more is the residue conserved. Residue can be predicted to be exposed (e), buried (b), functional highly conserved, and exposed residue (f), structural highly conserved, buried (s), and x insufficient data

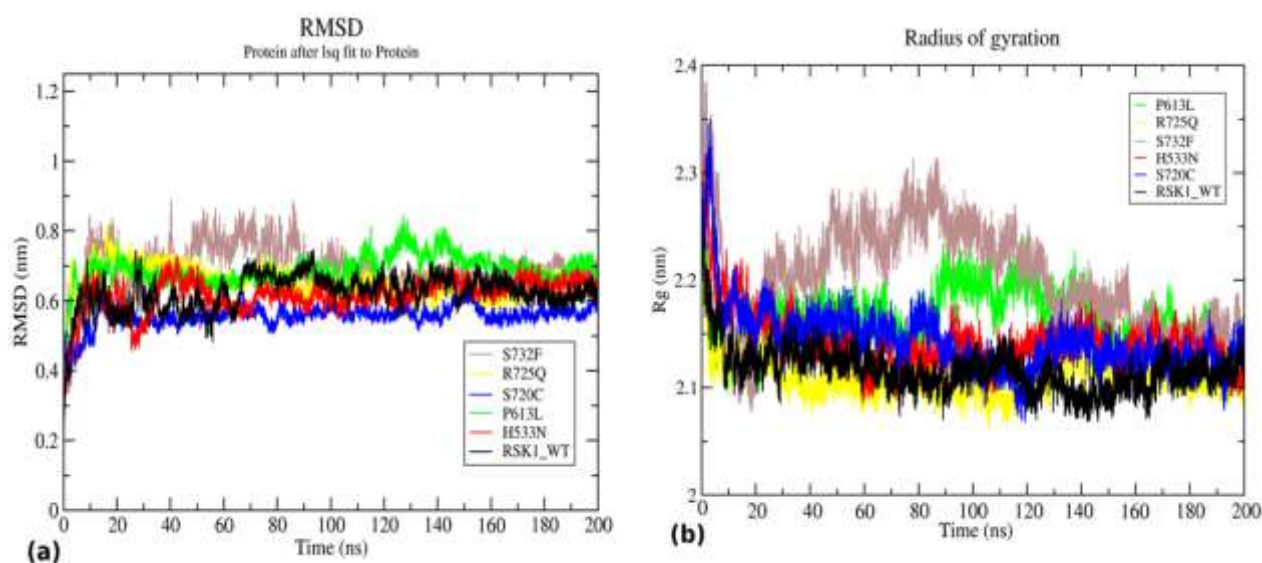

**Figure S2.** Structural stability and compactness analysis of RSK1-CTKD WT (black) and mutants H533N (red), P613L (green), S720C (blue), R725Q (yellow), and S732F (brown), (a) RMSD of WT and mutants showing similar pattern, (b) Rg of WT and mutant indicating alteration to some extent in compactness of a structure

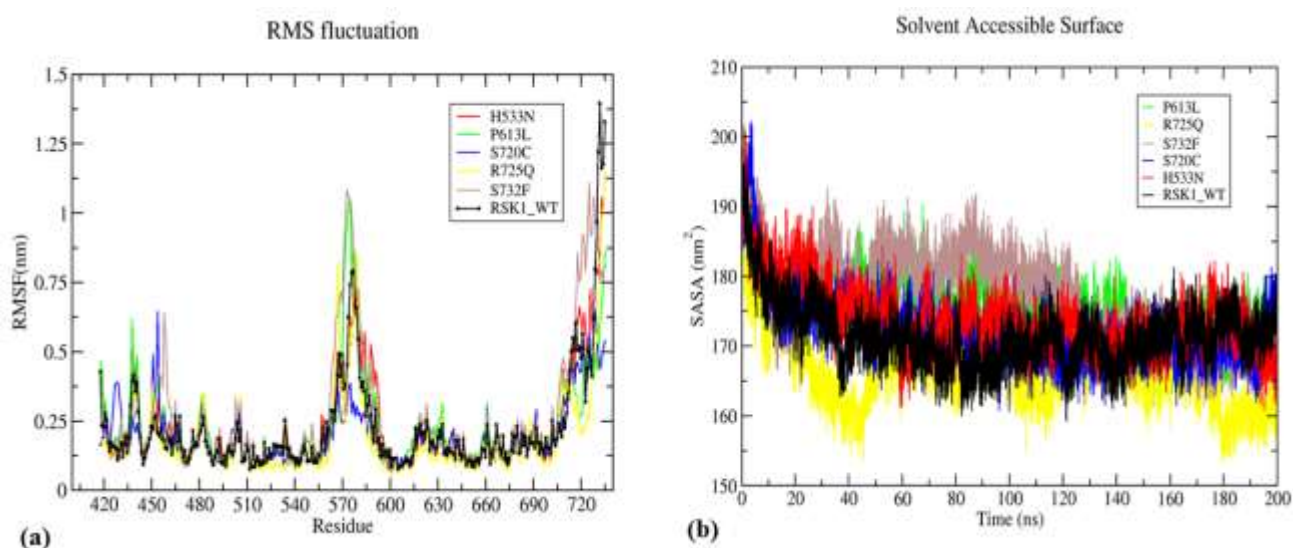

**Figure S3.** Structural flexibility and Solvent accessible surface area (SASA) analysis of RSK1-CTKD WT (black) mutants H533N (red), P613L (green), S720C (blue), R725Q (yellow), and S732F (brown). (a) RMSF of WT and mutants showing minor changes in the flexibility of a protein, (b) SASA of wild-type and mutant indicating not much alteration in an area accessible to the solvent

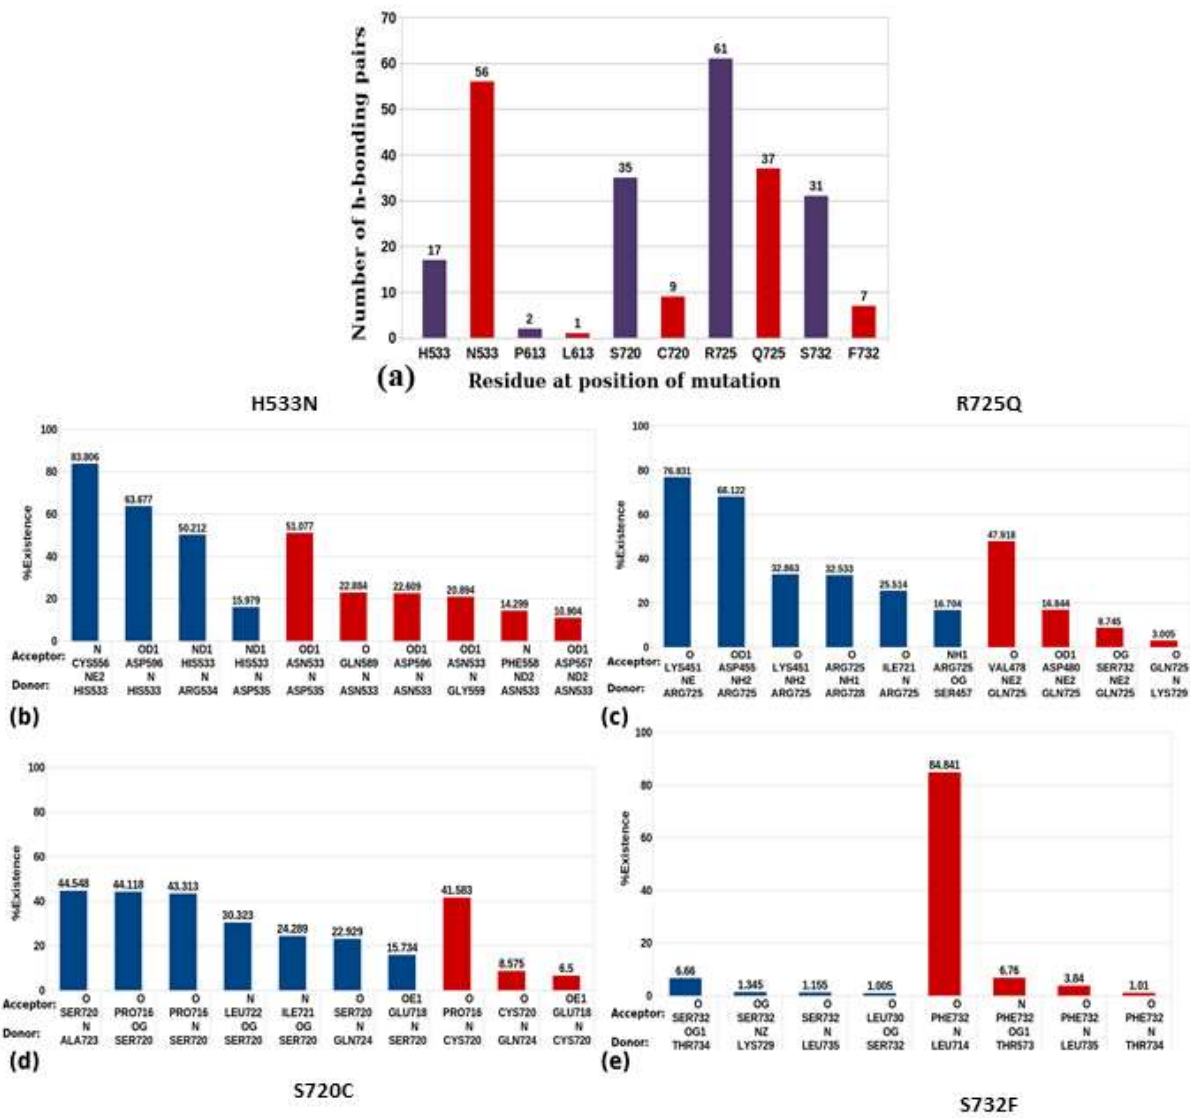

**Figure S4.** Several intramolecular hydrogen bonding pairs and their % existence throughout the simulation of WT and mutated residue **(a)** number of H-bonding pair formed by WT residue and mutated residue, **(b-e)** high scored H-bond existence formed by WT residue and mutated residue in **(b)** H533N **(c)** R725Q **(d)** S720C, and **(e)** S732F

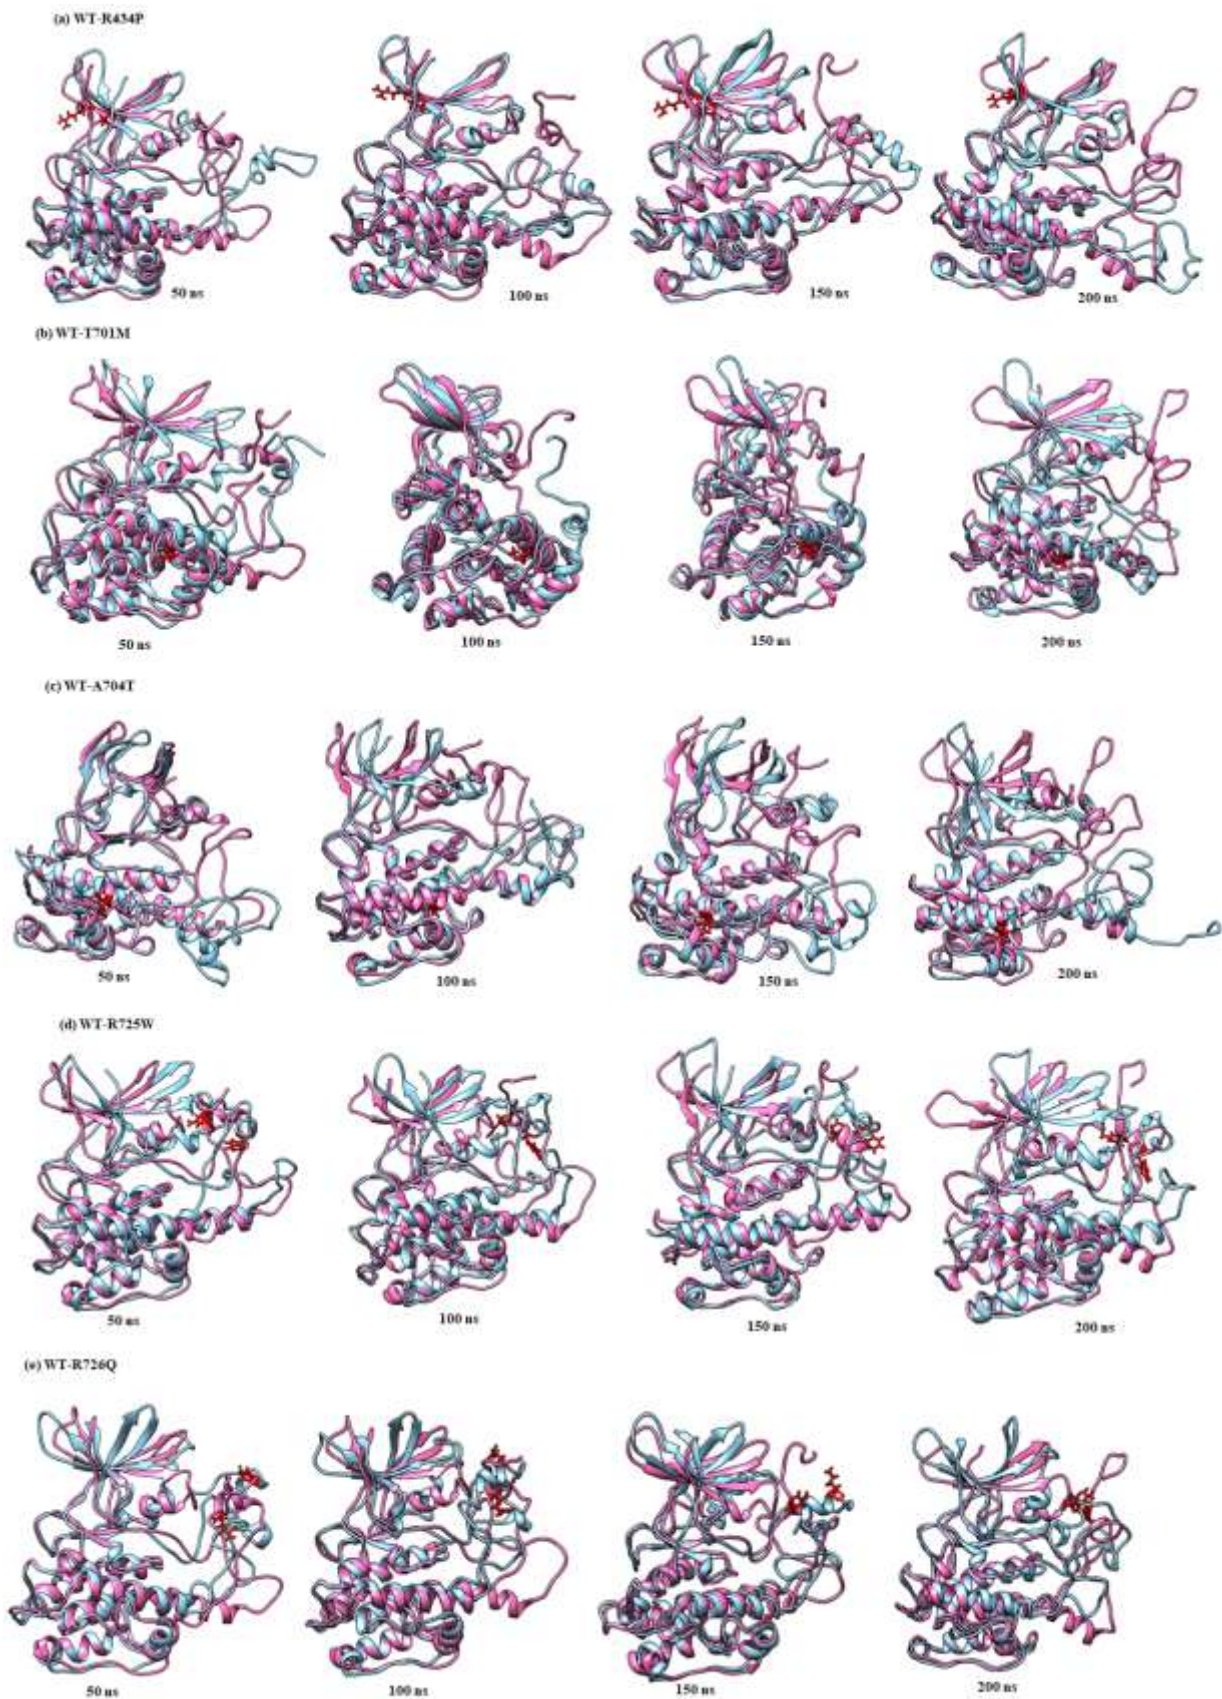

**Figure S5.** Snapshot of WT and mutant (a) R434P, (b) T701M, (c) A704T, (d), R725W, and (e) R726Q RSK1-CTKD confirmation at different simulation time steps

**Table S1:** Functional consequences of missense mutations predicted by SIFT, PolyPhen2, PhD-SNP, PMut, and PROVEAN

| Protein Change | phD-SNP | Pmut    | PROVEAN     | SIFT        | PolyPhen2         |
|----------------|---------|---------|-------------|-------------|-------------------|
| S457L          | neutral | disease | Deleterious | Deleterious | Benign            |
| R588L          | Disease | disease | Deleterious | Deleterious | Probably damaging |
| R434H          | neutral | disease | Deleterious | Deleterious | Probably damaging |
| S719P          | neutral | neutral | Neutral     | Tolerated   | Benign            |
| G530R          | Disease | disease | Deleterious | Deleterious | Probably damaging |
| R503Q          | Disease | neutral | Tolerated   | Tolerated   | Benign            |
| G520D          | Disease | neutral | Neutral     | Deleterious | Possibly damaging |
| R493W          | Disease | disease | Deleterious | Deleterious | Probably damaging |
| E623K          | neutral | disease | Tolerated   | Tolerated   | Benign            |
| E490V          | Disease | disease | Deleterious | Deleterious | Probably damaging |
| L463F          | Disease | disease | Deleterious | Deleterious | Probably damaging |
| G617S          | neutral | neutral | Tolerated   | Tolerated   | Probably damaging |
| G495E          | Disease | disease | Deleterious | Deleterious | Probably damaging |
| E524G          | neutral | disease | Deleterious | Tolerated   | Probably damaging |
| G639V          | Disease | disease | Deleterious | Deleterious | Benign            |
| S539C          | Disease | disease | Deleterious | Deleterious | Probably damaging |
| R565Q          | neutral | disease | Deleterious | Deleterious | Probably damaging |
| G630S          | neutral | neutral | Deleterious | Tolerated   | Benign            |
| R554H          | neutral | disease | Deleterious | Deleterious | Probably damaging |
| Y605H          | Disease | disease | Deleterious | Deleterious | Possibly damaging |
| A704T          | Disease | disease | Deleterious | Deleterious | Probably damaging |
| E524Q          | neutral | neutral | Neutral     | Tolerated   | Probably damaging |
| P682S          | neutral | neutral | Tolerated   | Tolerated   | Probably damaging |
| T701M          | Disease | disease | Deleterious | Deleterious | Probably damaging |
| K451M          | Disease | disease | Deleterious | Deleterious | Probably damaging |
| S720C          | neutral | disease | Deleterious | Deleterious | Probably damaging |
| T577A          | Disease | disease | Deleterious | Deleterious | Possibly damaging |
| S708F          | neutral | disease | Deleterious | Tolerated   | Benign            |
| A582V          | Disease | disease | Deleterious | Deleterious | Probably damaging |
| R726Q          | Disease | disease | Deleterious | Deleterious | Benign            |
| V515D          | Disease | disease | Deleterious | Deleterious | Probably damaging |
| P613L          | Disease | disease | Deleterious | Deleterious | Probably damaging |
| P712S          | neutral | disease | Deleterious | Tolerated   | Benign            |
| F614L          | Disease | disease | Deleterious | Deleterious | Probably damaging |
| V531F          | Disease | neutral | Deleterious | Deleterious | Probably damaging |
| K421N          | neutral | disease | Deleterious | Deleterious | Benign            |
| V419M          | neutral | neutral | Neutral     | Tolerated   | Benign            |
| R725W          | Disease | disease | Deleterious | Deleterious | Probably damaging |
| R588H          | neutral | neutral | Deleterious | Tolerated   | Probably damaging |
| A439T          | neutral | neutral | Neutral     | Tolerated   | Benign            |

|       |         |         |             |             |                   |
|-------|---------|---------|-------------|-------------|-------------------|
| S732F | neutral | neutral | Deleterious | Deleterious | Benign            |
| N411S | neutral | neutral | Neutral     | Tolerated   | Benign            |
| V652M | neutral | disease | Neutral     | Deleterious | Possibly damaging |
| V485A | Disease | neutral | Deleterious | Tolerated   | Possibly damaging |
| H533N | Disease | disease | Deleterious | Deleterious | Benign            |
| L463P | Disease | disease | Deleterious | Deleterious | Probably damaging |
| V446I | neutral | neutral | Neutral     | Deleterious | Probably damaging |
| L536M | Disease | disease | Neutral     | Deleterious | Probably damaging |
| G610D | Disease | disease | Deleterious | Deleterious | Possibly damaging |
| T606I | Disease | neutral | Deleterious | Tolerated   | Benign            |
| G630D | Disease | disease | Deleterious | Tolerated   | Probably damaging |
| P673L | Disease | disease | Deleterious | Deleterious | Benign            |
| R663C | Disease | disease | Deleterious | Deleterious | Probably damaging |
| R725Q | Disease | disease | Deleterious | Deleterious | Possibly damaging |
| K521R | neutral | neutral | Neutral     | Tolerated   | Benign            |
| L463I | neutral | neutral | Neutral     | Deleterious | Probably damaging |
| R434P | Disease | disease | Deleterious | Deleterious | Probably damaging |
| Q468L | Disease | disease | Deleterious | Deleterious | Probably damaging |
| R510Q | neutral | neutral | Neutral     | Tolerated   | Benign            |
| L636P | Disease | disease | Deleterious | Deleterious | Possibly damaging |
| L502M | neutral | neutral | Neutral     | Tolerated   | Probably damaging |

**Table S2:** Effect of 10 mutations over RSK1-CTKD predicted by HOPE server

| Protein Change | Structure                                                                           | Properties                                                                                                                                                                                                                                                                                                                                                                                                                                                                                                              |
|----------------|-------------------------------------------------------------------------------------|-------------------------------------------------------------------------------------------------------------------------------------------------------------------------------------------------------------------------------------------------------------------------------------------------------------------------------------------------------------------------------------------------------------------------------------------------------------------------------------------------------------------------|
| R434P          |    | <ol style="list-style-type: none"> <li>1. Mutant residue is smaller and hydrophobic than wild type.</li> <li>2. Positive wild type residue mutated into neutral charge residue.</li> <li>3. Disruption in Salt bridge interaction between Glutamic acid 422 and 443.</li> <li>4. The mutated residue is located in a domain that is important for the binding of other molecules. The mutated residue is in contact with residues in another domain. The mutation may disturb these contacts.</li> </ol>                |
| H533N          |  | <ol style="list-style-type: none"> <li>1. Mutant residue is smaller and hydrophobic than wild type.</li> <li>2. Disruption in hydrogen bonding between aspartic acid 535 and cysteine 556.</li> <li>3. The mutated residue is located in a domain that is important for the activity of the protein and in contact with residues in another domain. This interaction may be important for the correct function of the protein. The mutation can affect this interaction and as such affect protein function.</li> </ol> |
| P613L          |  | <ol style="list-style-type: none"> <li>1. The mutant residue is bigger than the wild-type residue.</li> <li>2. wild-type residue was buried in the core of the protein. The mutant residue is bigger and probably will not fit.</li> <li>3. The mutated residue is located in a domain that is important for the</li> </ol>                                                                                                                                                                                             |



|       |                                                                                    |                                                                                                                                                                                                                                                                                                                                                                                                                                                                                                                                                                                                                                                                                                                                                              |
|-------|------------------------------------------------------------------------------------|--------------------------------------------------------------------------------------------------------------------------------------------------------------------------------------------------------------------------------------------------------------------------------------------------------------------------------------------------------------------------------------------------------------------------------------------------------------------------------------------------------------------------------------------------------------------------------------------------------------------------------------------------------------------------------------------------------------------------------------------------------------|
|       |                                                                                    | <p>activity of the protein and in contact with another domain that is known to be involved in binding. The interaction between these domains could be disturbed by the mutation, which might affect the signal transduction between the domains.</p>                                                                                                                                                                                                                                                                                                                                                                                                                                                                                                         |
| T701M |  | <ol style="list-style-type: none"> <li>1. Mutant residue bigger and more hydrophobic than wild type.</li> <li>2. Disruption of a hydrogen bond at alanine 697</li> <li>3. The wild-type residue was buried in the core of the protein. The mutant residue is bigger and probably will not fit. The mutation will cause loss of hydrogen bonds in the core of the protein and as a result, disturb correct folding.</li> <li>4. The mutated residue is located in a domain that is important for the activity of the protein and in contact with another domain that is known to be involved in binding. The interaction between these domains could be disturbed by the mutation, which might affect the signal transduction between the domains.</li> </ol> |

|              |                                                                                     |                                                                                                                                                                                                                                                                                                                                                                                                                                                                                                                                                                                                                                                                        |
|--------------|-------------------------------------------------------------------------------------|------------------------------------------------------------------------------------------------------------------------------------------------------------------------------------------------------------------------------------------------------------------------------------------------------------------------------------------------------------------------------------------------------------------------------------------------------------------------------------------------------------------------------------------------------------------------------------------------------------------------------------------------------------------------|
| <p>A704T</p> |    | <ol style="list-style-type: none"> <li>1. Mutant residue bigger and more hydrophobic than wild type.</li> <li>2. The wild-type residue was buried in the core of the protein. The mutant residue is bigger and probably will not fit and will probably leads to loss of hydrophobic interactions in the core of the protein.</li> <li>3. The mutated residue is located in a domain that is important for the activity of the protein and in contact with another domain that is known to be involved in binding. The interaction between these domains could be disturbed by the mutation, which might affect the signal transduction between the domains.</li> </ol> |
| <p>S720C</p> |  | <ol style="list-style-type: none"> <li>1. Mutated residue is more hydrophobic than wild type and will cause loss of hydrogen bonds in the core of the protein and as a result disturb correct folding.</li> <li>2. The mutated residue is located in a domain that is important for the activity of the protein and in contact with another domain that is known to be involved in binding. The interaction between these domains could be disturbed by the mutation, which might affect the signal transduction between the domains.</li> </ol>                                                                                                                       |

|       |                                                                                     |                                                                                                                                                                                                                                                                                                                                                                                                                                                                                                                                                                                                                                                                                                            |
|-------|-------------------------------------------------------------------------------------|------------------------------------------------------------------------------------------------------------------------------------------------------------------------------------------------------------------------------------------------------------------------------------------------------------------------------------------------------------------------------------------------------------------------------------------------------------------------------------------------------------------------------------------------------------------------------------------------------------------------------------------------------------------------------------------------------------|
| R725W |    | <ol style="list-style-type: none"> <li>1. Mutant residue is smaller and hydrophobic than wild type.</li> <li>2. Positive wild type residue mutated into neutral charge residue.</li> <li>3. The residue is located on the surface of the protein, mutation of this residue can disturb external interactions with other molecules or other parts of the protein.</li> <li>4. The mutated residue is located in a domain that is important for the activity of the protein and in contact with another domain that is known to be involved in binding. The interaction between these domains could be disturbed by the mutation, which might affect the signal transduction between the domains.</li> </ol> |
| R725Q |  | <ol style="list-style-type: none"> <li>1. Mutant residue is smaller and hydrophobic than wild type.</li> <li>2. Positive wild type residue mutated into neutral charge residue.</li> <li>3. The residue is located on the surface of the protein, mutation of this residue can disturb external interactions with other molecules or other parts of the protein.</li> <li>4. The mutated residue is located in a domain that is important for the activity of the protein and in contact with another domain that is known to be involved in binding. The interaction between these domains could be disturbed by the mutation, which might affect the signal transduction between the domains.</li> </ol> |

|       |                                                                                     |                                                                                                                                                                                                                                                                                                                                                                                                                                                                                                                                                                                                                                                                                                            |
|-------|-------------------------------------------------------------------------------------|------------------------------------------------------------------------------------------------------------------------------------------------------------------------------------------------------------------------------------------------------------------------------------------------------------------------------------------------------------------------------------------------------------------------------------------------------------------------------------------------------------------------------------------------------------------------------------------------------------------------------------------------------------------------------------------------------------|
| R726Q | 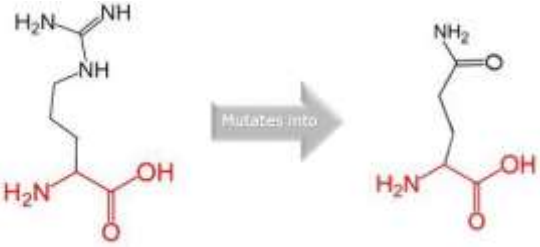   | <ol style="list-style-type: none"> <li>1. Mutant residue is smaller and hydrophobic than wild type.</li> <li>2. Positive wild type residue mutated into neutral charge residue.</li> <li>3. The residue is located on the surface of the protein, mutation of this residue can disturb external interactions with other molecules or other parts of the protein.</li> <li>4. The mutated residue is located in a domain that is important for the activity of the protein and in contact with another domain that is known to be involved in binding. The interaction between these domains could be disturbed by the mutation, which might affect the signal transduction between the domains.</li> </ol> |
| S732F |  | <ol style="list-style-type: none"> <li>1. Mutant residue is bigger and hydrophobic than wild type.</li> <li>2. The mutated residue is located in a domain that is important for the activity of the protein and in contact with another domain that is known to be involved in binding. The interaction between these domains could be disturbed by the mutation, which might affect the signal transduction between the domains.</li> </ol>                                                                                                                                                                                                                                                               |
